# Supplementary material
Source: MDPI journal article supplement (https://www.mdpi.com/2227-9075/2/2/277)
Supplement: s1 [file s1]

*Article*

## **Optimization of Biochemical Screening Methods for Volatile and Unstable Sesquiterpenoids Using HS-SPME-GC-MS**

**Trine Bundgaard Andersen, Federico Cozzi and Henrik Toft Simonsen \***

Section for Plant Biochemistry, Department of Plant and Environmental Sciences, University of Copenhagen Thorvaldsensvej 40, 1871 Frederiksberg C, Denmark; E-Mails: trba@plen.ku.dk (T.B.A.); fcozzi@plen.ku.dk (F.C.)

\* Author to whom correspondence should be addressed; E-Mail: hts@plen.ku.dk.

## Supplementary Materials

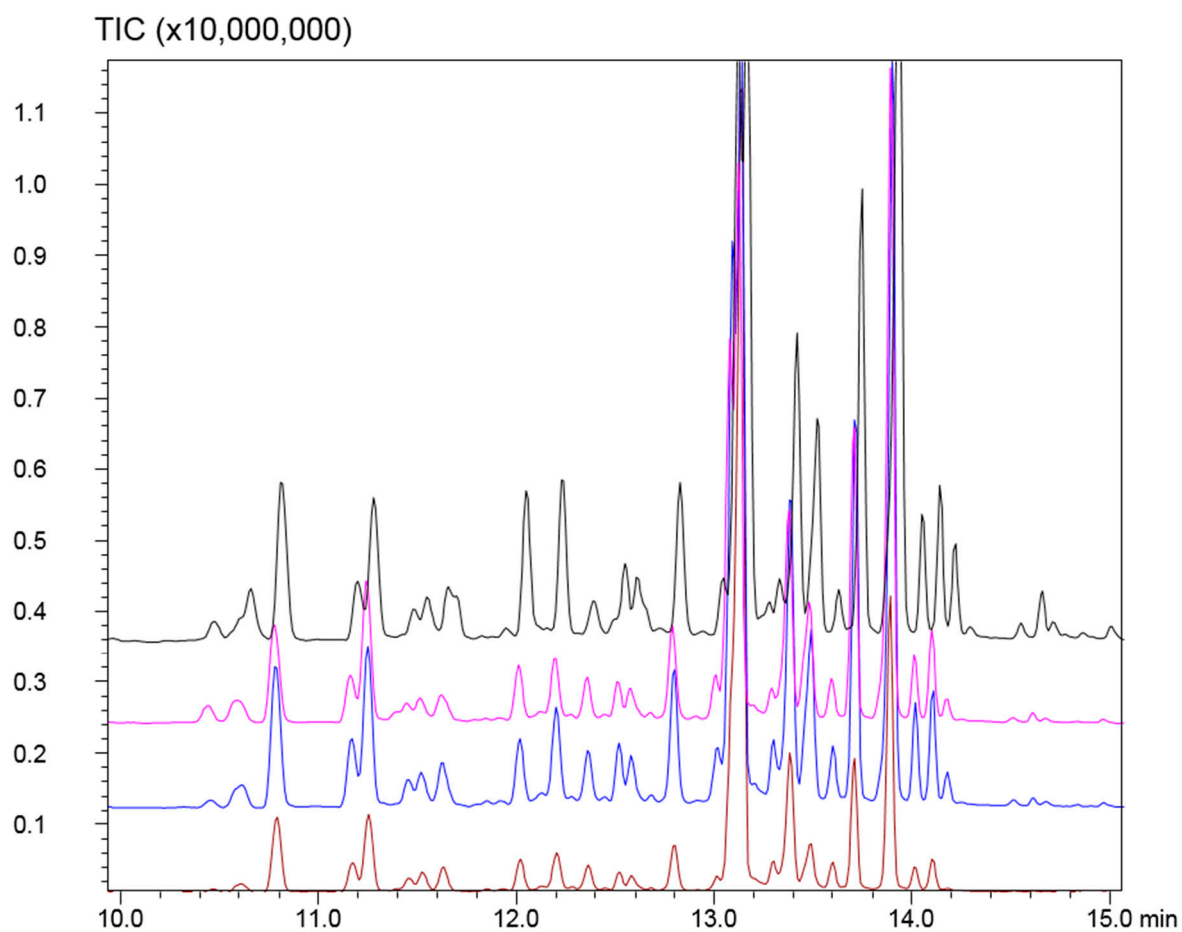

**Figure 1.** *TTPS7414* profile using PDMS/DVB/CAR. Injection port temperature 160 °C (brown), 190 °C (blue), 220 °C (pink) and 250 °C (black).

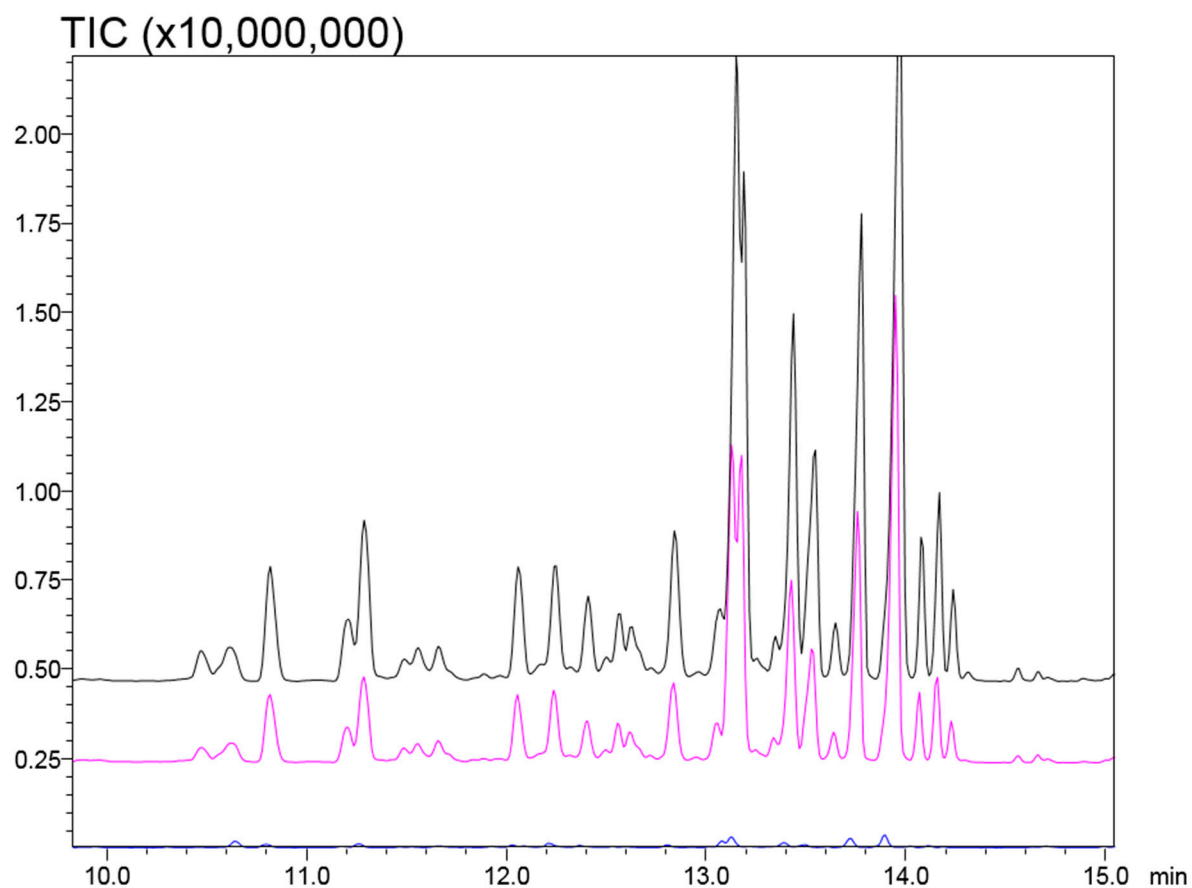

**Figure 2.** *T/TPS7414* Injection port temperature 250 °C using PDMS/CAR/DVB fiber. Black: co infiltration with DXS. Pink: co infiltration with HMGR. Blue: without any co-infiltration. It is clear that the use of either DXS or HMGR boost the production of terpenoids.

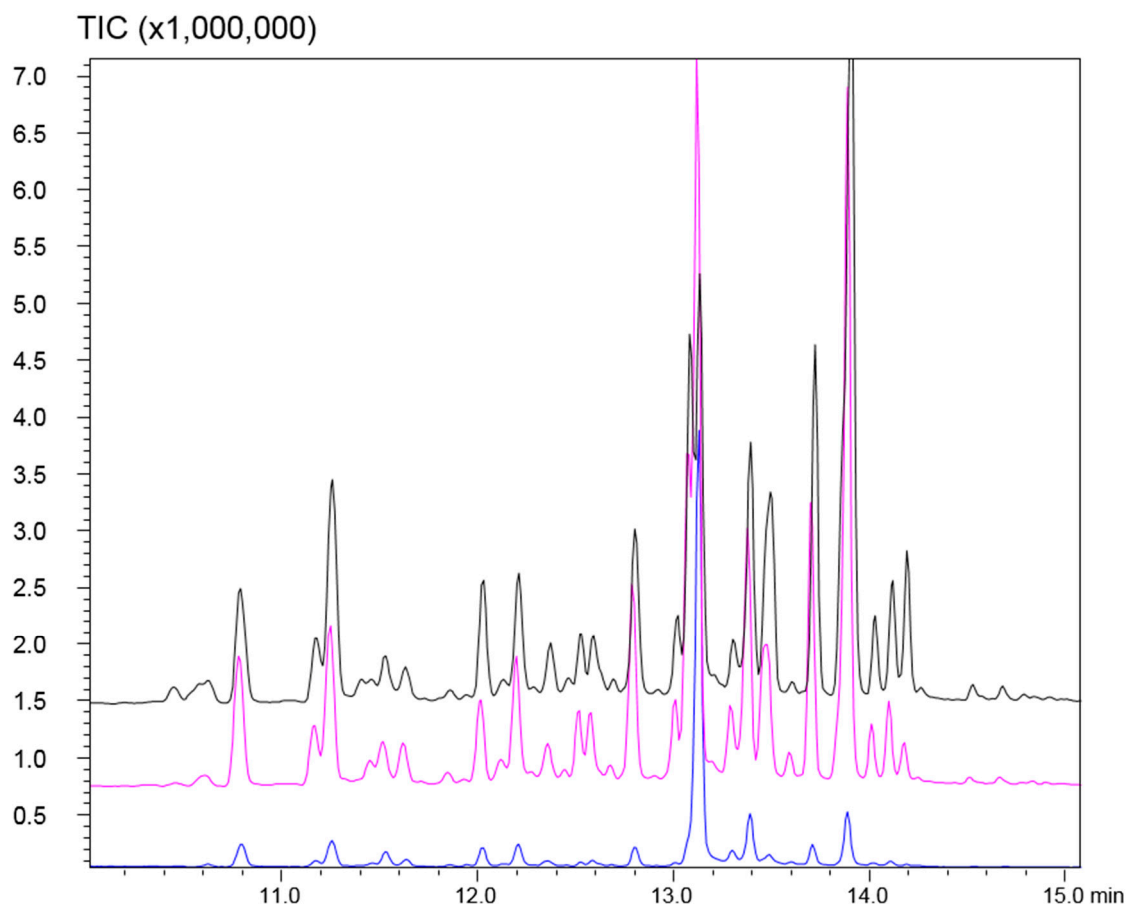

**Figure 3.** *T/TPS7414* profile using CAR/PDMS. Injection port temperature 110 °C (blue), 160 °C (pink) and 250 °C (black).

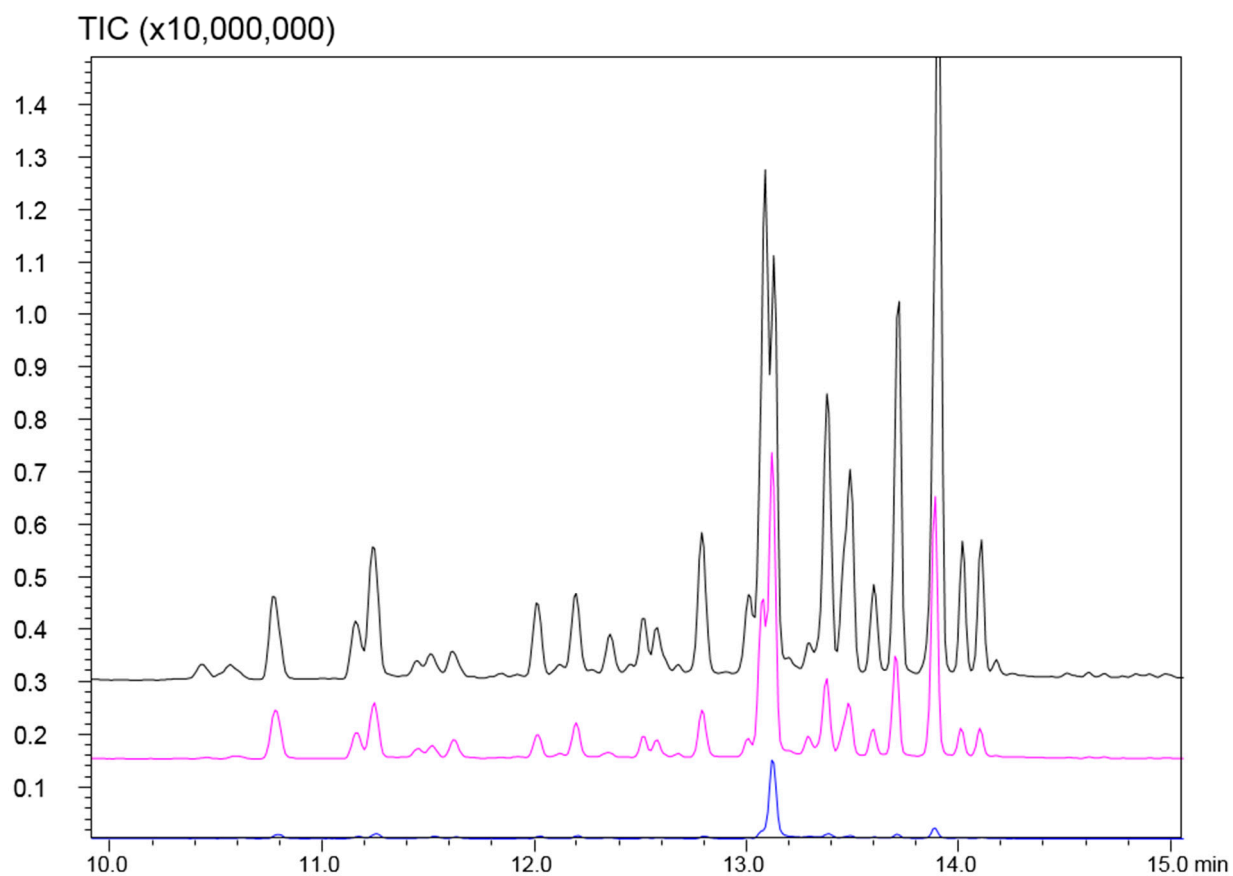

**Figure 4.** *TTPS7414* profile using PDMS/DVP. Injection port temperature 110 °C (blue), 160 °C (pink) and 250 °C (black).

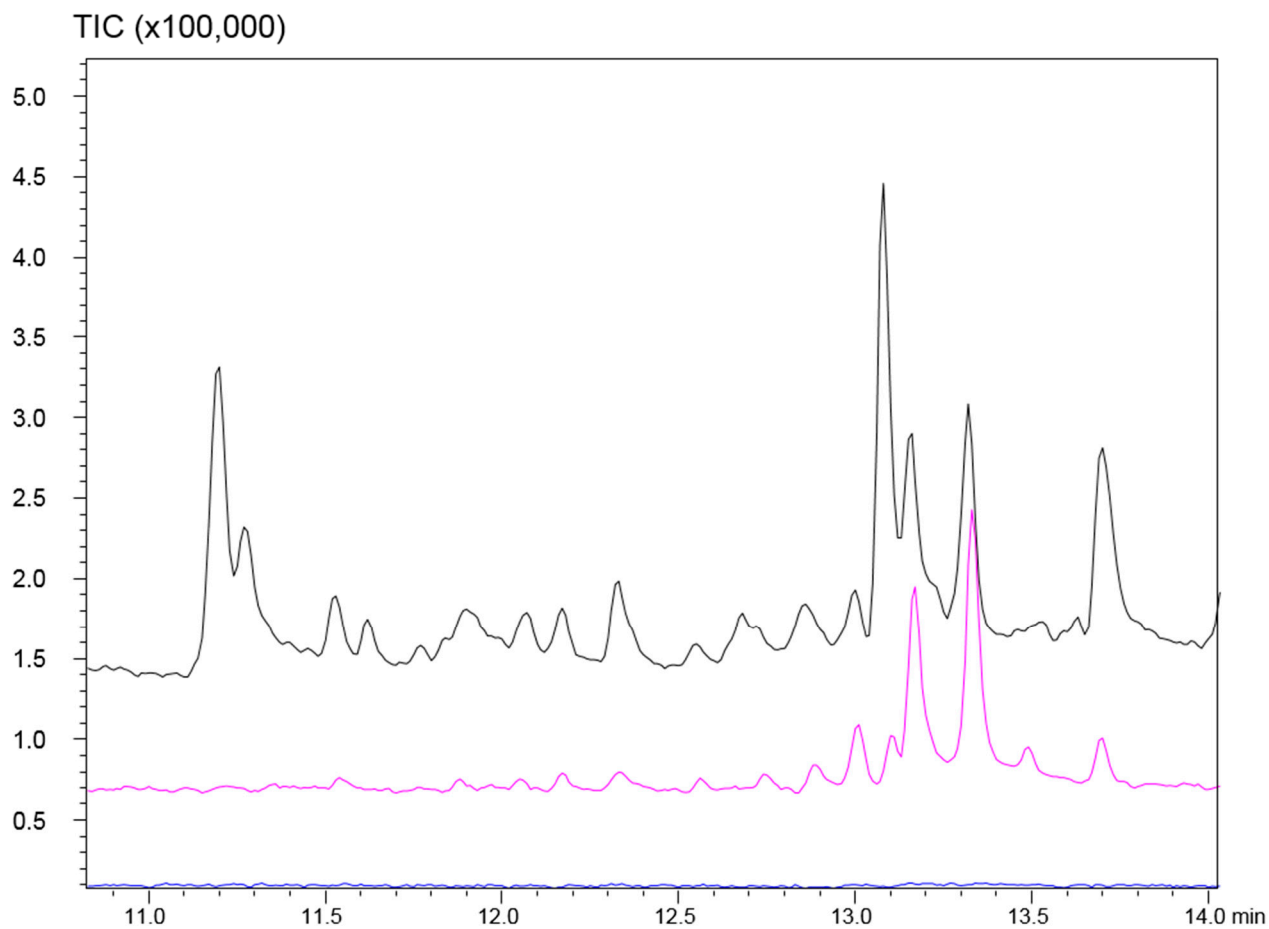

**Figure 5.** *Tp*GAS profile using PDMS/DVP. Injection port temperature 110 °C (blue), 160 °C (pink) and 250 °C (black).

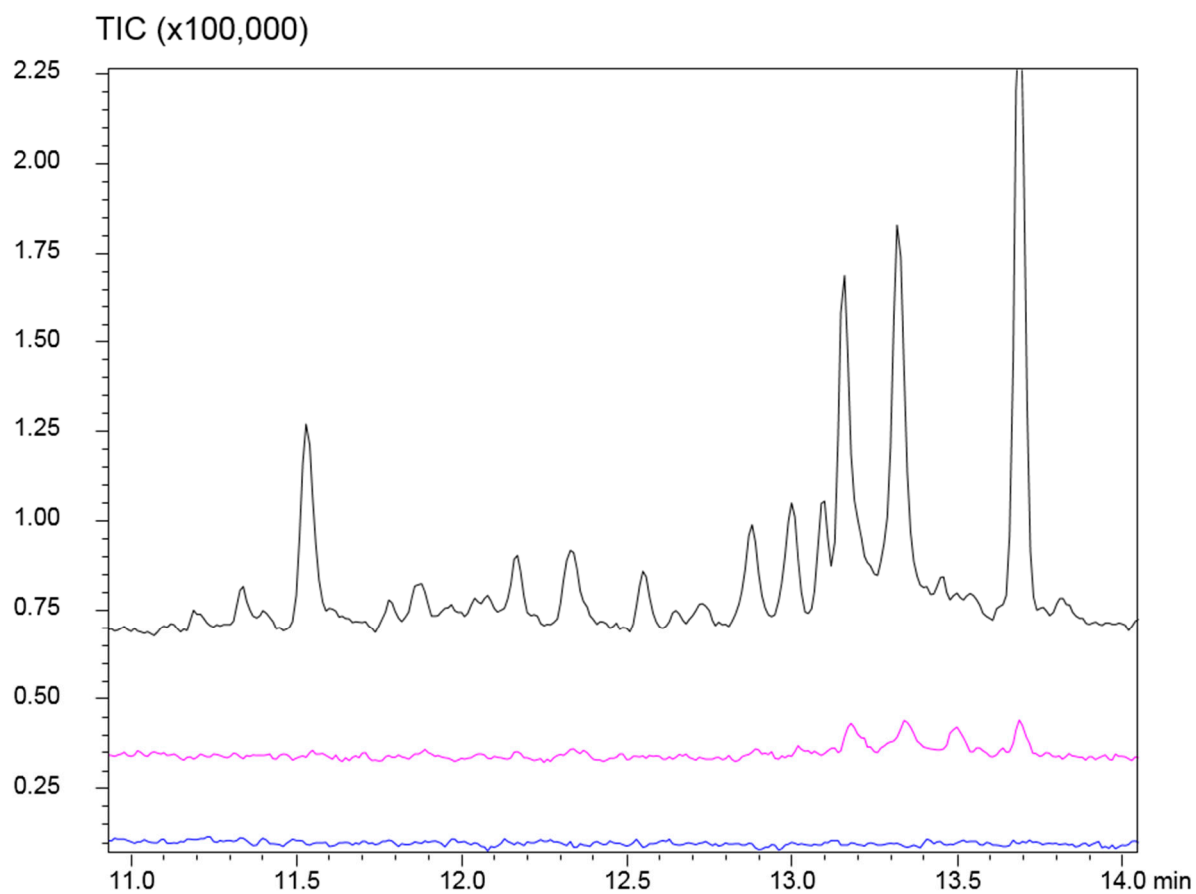

**Figure 6.** *Tp*GAS profile using CAR/PDMS. Injection port temperature 110 °C (blue), 160 °C (pink) and 250 °C (black).

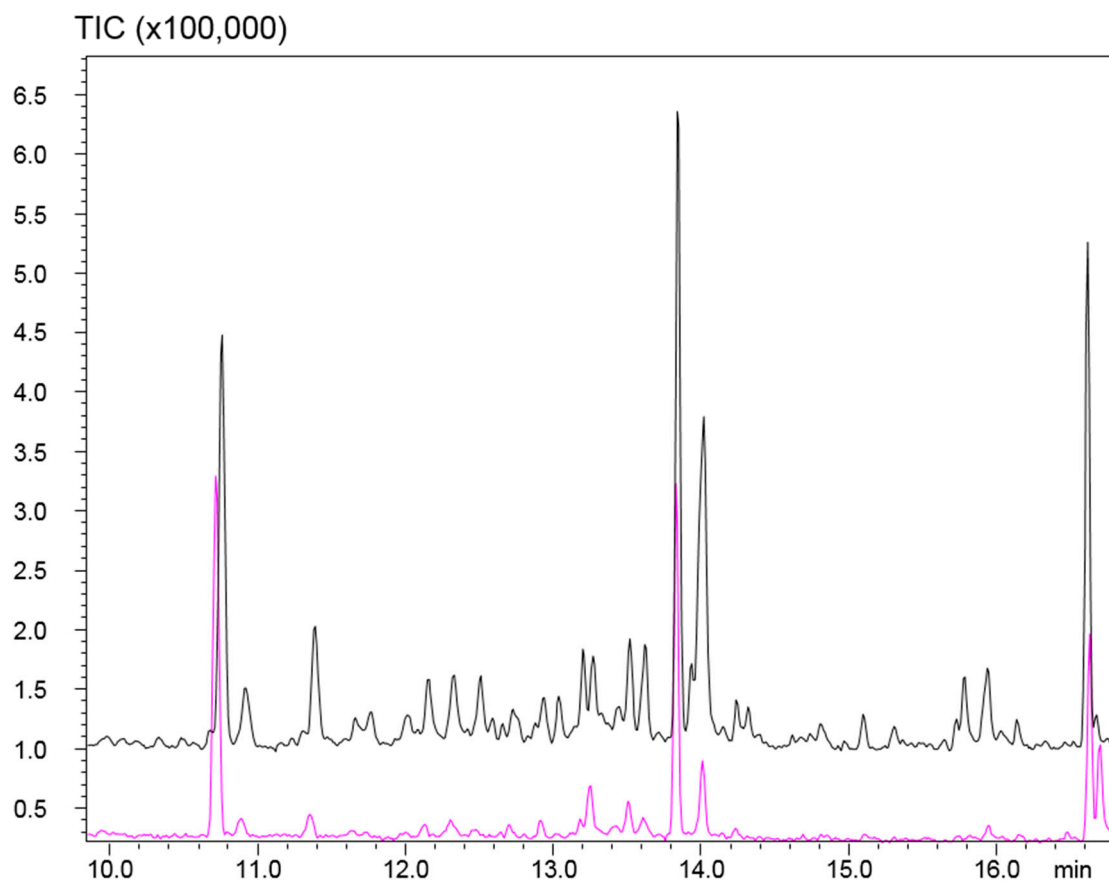

**Figure 7.** *TgTPS2* profile using CAR/PDMS. Injection port temperature 160 °C (pink) and 250 °C (black).



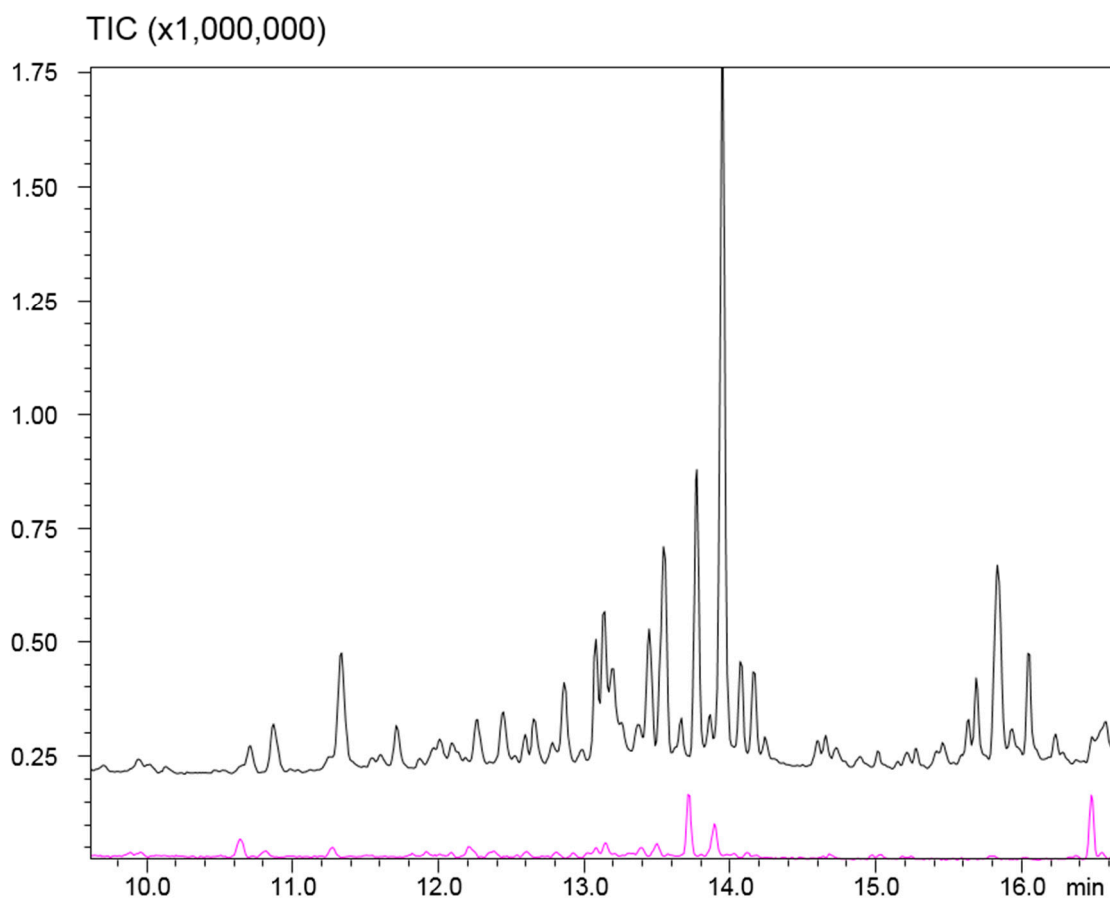

**Figure 8.** *TgTPS2* profile using PDMS/DVP. Injection port temperature 160 °C (pink) and 250 °C (black).s
